# Supplementary material for: An “In-Depth” Description of the Small Non-coding RNA Population of Schistosoma japonicum Schistosomulum
Source: PLoS Negl Trop Dis. 2010 Feb 9;4(2):e596. doi: 10.1371/journal.pntd.0000596 (PMC2817716; doi:10.1371/journal.pntd.0000596)
Supplement: Table S4 — Predicted secondary structure of IsomiRs for 16 schistosome-specific miRNAs. (0.04 MB XLS) [file pntd.0000596.s005.xls]

## Sheet: Sheet1
Table S4 Predicted secondary structure of IsomiRs for 16 Schistosome-specific miRNAs
sja-miR-novel-01 CAC|CCON0000000468.1|:21744:21818:- 75(nt) -31.90(kcal/mol)a	number of reads
CTAGGGGATGAGTGAGATTGTTGCATATTTACATTGCTGGTATGTATTATGCAACGTTTCACTCTACTCCGGGGA	6913b
((.((((..(((((((((.((((((((..(((((.......))))).)))))))))))))))))..)))).))..
**********AGTGAGATTGTTGCATATTTACA******************************************	2167d
********************************************TATTATGCAACGTTTCACTCT**********	4744c
----------AGTGAGATTGTTGCATATT----------------------------------------------	4e
----------AGTGAGATTGTTGCATATTT---------------------------------------------	135
----------AGTGAGATTGTTGCATATTTA--------------------------------------------	653
----------AGTGAGATTGTTGCATATTTAC-------------------------------------------	24
----------AGTGAGATTGTTGCATATTTACA------------------------------------------	785
----------AGTGAGATTGTTGCATATTTACAT-----------------------------------------	9
----------AGTGAGATTGTTGCATATTTACATT----------------------------------------	3
-----------GTGAGATTGTTGCATATT----------------------------------------------	1
-----------GTGAGATTGTTGCATATTT---------------------------------------------	11
-----------GTGAGATTGTTGCATATTTA--------------------------------------------	188
-----------GTGAGATTGTTGCATATTTAC-------------------------------------------	188
-----------GTGAGATTGTTGCATATTTACA------------------------------------------	146
-----------GTGAGATTGTTGCATATTTACAT-----------------------------------------	1
-----------GTGAGATTGTTGCATATTTACATT----------------------------------------	1
------------TGAGATTGTTGCATATTTA--------------------------------------------	4
------------TGAGATTGTTGCATATTTACA------------------------------------------	3
-------------GAGATTGTTGCATATTTA--------------------------------------------	2
-------------GAGATTGTTGCATATTTACA------------------------------------------	6
-------------GAGATTGTTGCATATTTACAT-----------------------------------------	1
-------------GAGATTGTTGCATATTTACATT----------------------------------------	2
--------------AGATTGTTGCATATTTACATT----------------------------------------	2
--------------------------------------------TATTATGCAACGTTTCAC-------------	117
--------------------------------------------TATTATGCAACGTTTCACT------------	336
--------------------------------------------TATTATGCAACGTTTCACTC-----------	400
--------------------------------------------TATTATGCAACGTTTCACTCT----------	3833
--------------------------------------------TATTATGCAACGTTTCACTCTA---------	14
--------------------------------------------TATTATGCAACGTTTCACTCTAC--------	2
---------------------------------------------ATTATGCAACGTTTCACT------------	3
---------------------------------------------ATTATGCAACGTTTCACTC-----------	3
---------------------------------------------ATTATGCAACGTTTCACTCT----------	28
---------------------------------------------ATTATGCAACGTTTCACTCTA---------	1
----------------------------------------------TTATGCAACGTTTCACTCT----------	4
-----------------------------------------------TATGCAACGTTTCACTCT----------	3
a The information of the pre-miRNA are denoted withCAC|CCON0000000468.1|:21744:21818:- (The location of the predicted pre-miRNA), 75(nt) (The length of the predicted pre-miRNA), -31.90 (kcal/mol) (Free energy of folding).
b The sum of number of reads for all small RNA sequences that matched the pre-miRNA.
c The sum of number of reads for all miRNA sequences that matched the pre-miRNA.
d The sum of number of reads for all miRNA* sequences that matched the pre-miRNA.
e The number of reads of each small RNA sequences that matched the pre-miRNA
It is the same to the predicted secondary structure as follows.
sja-miR-novel-02 CAC|CCON0000000054.1|:380063:380138:- 76(nt) -31.50(kcal/mol)
CATGTTTGTGAGGTGGATGTTAGTGCAATTTAGTGACGTAAATATATTGCACTTACCTTCGCCTTGCAAATATAGG	1268
.(((((((..(((((((.((.((((((((.((..........)).)))))))).)).)))))))..)))))))...
**********AGGTGGATGTTAGTGCAATTTA********************************************	458
********************************************TATTGCACTTACCTTCGCCTTG**********	809
-----TTGTGAGGTGGATGTTAGTGCA-------------------------------------------------	1
--------TGAGGTGGATGTTAGTGCAATT----------------------------------------------	7
---------GAGGTGGATGTTAGTGCAAT-----------------------------------------------	1
---------GAGGTGGATGTTAGTGCAATT----------------------------------------------	17
---------GAGGTGGATGTTAGTGCAATTT---------------------------------------------	30
----------AGGTGGATGTTAGTGCAAT-----------------------------------------------	2
----------AGGTGGATGTTAGTGCAATT----------------------------------------------	20
----------AGGTGGATGTTAGTGCAATTT---------------------------------------------	110
----------AGGTGGATGTTAGTGCAATTTA--------------------------------------------	240
-----------GGTGGATGTTAGTGCAATT----------------------------------------------	1
-----------GGTGGATGTTAGTGCAATTT---------------------------------------------	1
-----------GGTGGATGTTAGTGCAATTTA--------------------------------------------	19
------------GTGGATGTTAGTGCAATT----------------------------------------------	1
------------GTGGATGTTAGTGCAATTT---------------------------------------------	1
------------GTGGATGTTAGTGCAATTTA--------------------------------------------	8
--------------------------------------------TATTGCACTTACCTTCGC--------------	15
--------------------------------------------TATTGCACTTACCTTCGCC-------------	19
--------------------------------------------TATTGCACTTACCTTCGCCT------------	17
--------------------------------------------TATTGCACTTACCTTCGCCTT-----------	75
--------------------------------------------TATTGCACTTACCTTCGCCTTG----------	667
---------------------------------------------ATTGCACTTACCTTCGCCT------------	1
---------------------------------------------ATTGCACTTACCTTCGCCTT-----------	1
---------------------------------------------ATTGCACTTACCTTCGCCTTG----------	8
---------------------------------------------ATTGCACTTACCTTCGCCTTGC---------	2
----------------------------------------------TTGCACTTACCTTCGCCTTG----------	4
sja-miR-novel-03 CAC|CCON0000000100.1|:360647:360725:+ 79(nt) -28.12(kcal/mol)
TTCAGGCGCAACCCTTGTTCGACTGTGATGTGATTGAAATTAGCCCATATCACAGCCGTGCTTAAGGGCTTCGTCGAAA	190
(((.((((...((((((..((.((((((((((.............)))))))))).))....))))))...))))))).
**********ACCCTTGTTCGACTGTGATGTG***********************************************	186
***********************************************TATCACAGCCGTGCTTAAGGGC**********	3
----------ACCCTTGTTCGACTGTGATG-------------------------------------------------	3
----------ACCCTTGTTCGACTGTGATGT------------------------------------------------	17
----------ACCCTTGTTCGACTGTGATGTG-----------------------------------------------	163
-----------CCCTTGTTCGACTGTGATGTG-----------------------------------------------	1
------------CCTTGTTCGACTGTGATGTG-----------------------------------------------	1
-------------CTTGTTCGACTGTGATGTG-----------------------------------------------	1
--------------TTGTTCGACTGTGATGTG-----------------------------------------------	1
-----------------------------------------------TATCACAGCCGTGCTTAA--------------	1
-----------------------------------------------TATCACAGCCGTGCTTAAGGGC----------	2
sja-miR-novel-04 CAC|CCON0000000100.1|:360537:360625:+ 89(nt) -31.30(kcal/mol)
CGACCAGTTCGTCATCCATGGATTGTGATTTTCGGACTCCATGTTTCATTAAGTGAATATCACAGTCCTGCTTAGGTGACGAATTTCGT	70
(((..(((((((((((((.((((((((((.(((..(((..(((...)))..)))))).))))))))))))....)))))))))))))).
**********GTCATCCATGGATTGTGATTTT*********************************************************	19
*********************************************************TATCACAGTCCTGCTTAGGTGA**********	51
----------GTCATCCATGGATTGTGATTT----------------------------------------------------------	3
----------GTCATCCATGGATTGTGATTTT---------------------------------------------------------	16
--------------------------------------------------------ATATCACAGTCCTGCTTAGGTGA----------	1
---------------------------------------------------------TATCACAGTCCTGCTTAGGTGA----------	20
---------------------------------------------------------TATCACAGTCCTGCTTAGGTGAC---------	7
---------------------------------------------------------TATCACAGTCCTGCTTAGGTGACG--------	15
---------------------------------------------------------TATCACAGTCCTGCTTAGGTGACGA-------	8
sja-miR-novel-05 CAC|CCON0000000026.1|:667022:667097:+ 76(nt) -19.80(kcal/mol)
AGTGACGGCTGCAGGAGTTTGATTTCACATGTGAGTACCGCCTGGGAAACAGACATACCAATGCAGATGTTCTCTC	8
...((((.(((((((.(((((.((((.((.(((.....))).)).)))))))))...))..))))).)))).....
**********GCAGGAGTTTGATTTCACAT**********************************************	4
**********************************************AAACAGACATACCAATGCAG**********	4
----------GCAGGAGTTTGATTTCACAT----------------------------------------------	4
---------------------------------------------GAAACAGACATACCAATGCA-----------	1
----------------------------------------------AAACAGACATACCAATGCAG----------	3
sja-miR-novel-06 CAC|CCON0000000203.1|:59154:59244:- 91(nt) -22.10(kcal/mol)
GATGTAACTTTTCTTTACAGTGGGTCTCTTTGTGTTCTTTTGCGATGGCATTTGATGCAAAGGTGATCTTTGTATGGACAAATTTTTATGG	8
...........(((.(((((.(((((((((((((((....(((....)))...)))))))))).)))))))))).))).............
**********TTCTTTACAGTGGGTCTCTTT************************************************************	4
*************************************************************GGTGATCTTTGTATGGACAA**********	4
---------TTTCTTTACAGTGGGTCTCTTT------------------------------------------------------------	1
----------TTCTTTACAGTGGGTCTCTT-------------------------------------------------------------	1
----------TTCTTTACAGTGGGTCTCTTT------------------------------------------------------------	1
-----------TCTTTACAGTGGGTCTCTT-------------------------------------------------------------	1
-------------------------------------------------------------GGTGATCTTTGTATGGACA-----------	1
-------------------------------------------------------------GGTGATCTTTGTATGGACAA----------	3
sja-miR-novel-07 CAC|CCON0000000382.1|:255650:255739:- 90(nt) -54.50(kcal/mol)
CTAGTATGGAACTCCTCGGCAGTGTTCGCAAACCTGAAGCCCGTGGGGCAGAATCTAGGATGCGCACTGCCGAGGATTTCCATACTAGGA	7
(((((((((((.((((((((((((..((((..(((((.((((...))))....)).))).)))))))))))))))).)))))))))))..
**********ACTCCTCGGCAGTGTTCGCAAACCT*******************************************************	1
***********************************************************ATGCGCACTGCCGAGGATTTC**********	6
----------ACTCCTCGGCAGTGTTCGCAAACCT-------------------------------------------------------	1
----------------------------------------------------------GATGCGCACTGCCGAGGATTT-----------	2
----------------------------------------------------------GATGCGCACTGCCGAGGATTTC----------	2
-----------------------------------------------------------ATGCGCACTGCCGAGGATTTC----------	2
sja-miR-novel-08 CAC|CCON0000000012.1|:579173:579242:- 70(nt) -25.10(kcal/mol)
AATCTTCACCAGCTGAGATGGTTAGGACATGTGTTACATATGCCTGACCACCGTCTACTTTGAAGAGCAA	7
..((((((..((..(((.((((((((.((((((...)))))))))))))).).))..)).))))))....
**********AGCTGAGATGGTTAGGACAT****************************************	2
***************************************ATGCCTGACCACCGTCTACTT**********	5
--------CCAGCTGAGATGGTTAGGACAT----------------------------------------	1
----------AGCTGAGATGGTTAGGACAT----------------------------------------	1
--------------------------------------TATGCCTGACCACCGTCTAC------------	1
--------------------------------------TATGCCTGACCACCGTCTACT-----------	1
---------------------------------------ATGCCTGACCACCGTCTACT-----------	1
---------------------------------------ATGCCTGACCACCGTCTACTT----------	2
sja-miR-novel-09 CAC|CCON0000000036.1|:367751:367827:- 77(nt) -22.63(kcal/mol)
GTGACAGGTATTAGGTTTCGTTGTTTGTATTTATCAATTTCTAACACATACAAACAGCTAAACTTATAACCTATCTC	6
..((.((((..(((((((.(((((((((((.................))))))))))).)))))))..)))).))..
**********TTAGGTTTCGTTGTTTGTATTT*********************************************	3
***********************************************ATACAAACAGCTAAACTTAT**********	3
----------TTAGGTTTCGTTGTTTGTATTT---------------------------------------------	2
-----------TAGGTTTCGTTGTTTGTATTT---------------------------------------------	1
-----------------------------------------------ATACAAACAGCTAAACTTAT----------	3
sja-miR-novel-10 CAC|CCON0000000135.1|:48344:48419:+ 76(nt) -21.61(kcal/mol)
GGCTTTTACCAACTTGCGTCACTTGTGGTGTAGGCGAGACATTCGTTTACTGACGAAAGGACGCATTTACTGTGCA	6
.((...........((((((.(((.((..(((((((((...)))))))))...)).)))))))))........)).
***************GCGTCACTTGTGGTGTAGGCGA***************************************	1
********************************************GTTTACTGACGAAAGGACGCAT**********	4
-----------------GTCACTTGTGGTGTAGGCGAGAC------------------------------------	1
-----------------------TGTGGTGTAGGCGAGACATT---------------------------------	1
-------------------------------------------CGTTTACTGACGAAAGGACGC------------	1
--------------------------------------------GTTTACTGACGAAAGGACGC------------	1
--------------------------------------------GTTTACTGACGAAAGGACGCAT----------	2
sja-miR-novel-11 CAC|CCON0000000342.1|:217475:217565:- 91(nt) -18.70(kcal/mol)
ATTGGGTCCGTGCTCTCTGTGTTGAATTTGAGGATCTTGCTCTTTCCATTGTGTATGCTCAGGTCTATTGATGCTGAGATTACTGCTACGT	6
....(((..(((.((((.((((..((((((((.((...((.(........).)))).)))))))...)..)))).)))).))).)))....
*************TCTCTGTGTTGAATTTGA************************************************************	2
************************************************************AGGTCTATTGATGCTGAGATT**********	3
---------------TCTGTGTTGAATTTGAGGAT--------------------------------------------------------	2
-----------------TGTGTTGAATTTGAGGATCT------------------------------------------------------	1
------------------------------------------------------------AGGTCTATTGATGCTGAGATT----------	3
sja-miR-novel-12 CAC|CCON0000000053.1|:242456:242538:- 83(nt) -24.70(kcal/mol)
CCACCGCTCTTACCAACTTAGACTGAGTTATACTGCTACTGTAAGCTTTGTATATCACAGTCCAAGCTTTGGTAAGTTTTGAT	357
........(((((((((((.(((((.(.(((((.(((......)))...))))).).))))).)))..)))))))).......
**********TACCAACTTAGACTGAGTTAT****************************************************	121
****************************************************TATCACAGTCCAAGCTTTGGT**********	235
----------TACCAACTTAGACTGAGTTA-----------------------------------------------------	2
----------TACCAACTTAGACTGAGTTAT----------------------------------------------------	103
----------TACCAACTTAGACTGAGTTATA---------------------------------------------------	13
-----------ACCAACTTAGACTGAGTTAT----------------------------------------------------	2
-----------ACCAACTTAGACTGAGTTATA---------------------------------------------------	1
----------------------------------------------------TATCACAGTCCAAGCTTT-------------	4
----------------------------------------------------TATCACAGTCCAAGCTTTGG-----------	11
----------------------------------------------------TATCACAGTCCAAGCTTTGGT----------	119
----------------------------------------------------TATCACAGTCCAAGCTTTGGTA---------	20
----------------------------------------------------TATCACAGTCCAAGCTTTGGTAA--------	53
----------------------------------------------------TATCACAGTCCAAGCTTTGGTAAG-------	12
-----------------------------------------------------ATCACAGTCCAAGCTTTGGT----------	1
-----------------------------------------------------ATCACAGTCCAAGCTTTGGTA---------	6
-----------------------------------------------------ATCACAGTCCAAGCTTTGGTAA--------	9
--------------------------------------------------------ACAGTCCAAGCTTTGGTA---------	1
